# Supplementary material for: How within-country inequalities and co-coverage may affect LiST estimates of lives saved by scaling up interventions
Source: PubMed Central journal article supplement (PMC3847580; doi:10.1186/1471-2458-13-s3-s24), 2013-09-17
Supplement: 1471-2458-13-S3-S24-S1.pdf [file 1471-2458-13-S3-S24-S1.pdf]

Annex Table 1. Baseline coverage of the LiST indicators included in program scale up

|                                     | Antenatal care | Pregnant women protected via IPT or sleeping under an ITN | Skilled birth attendance | Exclusive breastfeeding for the first six months of life |                  | Vitamin A Supp.  | Insecticide treated bed nets or indoor residual spraying | Case mgmt of diarrhea (ORS) | Zinc for treatment of diarrhea | Case mgmt of pneumonia (oral antibiotics) <sup>a</sup> | Case mgmt. of malaria (ACTs) |
|-------------------------------------|----------------|-----------------------------------------------------------|--------------------------|----------------------------------------------------------|------------------|------------------|----------------------------------------------------------|-----------------------------|--------------------------------|--------------------------------------------------------|------------------------------|
| <b>All 18 Districts</b>             | 45%            | 38%                                                       | 71% <sup>b</sup>         | 55% <sup>b</sup>                                         | 28% <sup>b</sup> | 89%              | 64%                                                      | 23%                         | 4%                             | 33%                                                    | 26%                          |
| <b>Center North</b>                 | 49%            | 36%                                                       | 75% <sup>b</sup>         | 63% <sup>b</sup>                                         | 31% <sup>b</sup> | 88%              | 62%                                                      | 22%                         | 1%                             | 25%                                                    | 21%                          |
| Barsalogho                          | 43%            | 40%                                                       | 70% <sup>b</sup>         | 62% <sup>b</sup>                                         | 38% <sup>b</sup> | 93% <sup>b</sup> | 69%                                                      | 16%                         | 3%                             | 38%                                                    | 16%                          |
| Boulsa                              | 47%            | 31%                                                       | 59%                      | 75% <sup>b</sup>                                         | 23% <sup>b</sup> | 73%              | 68%                                                      | 9%                          | 0%                             | 19%                                                    | 16%                          |
| Kaya                                | 57%            | 46%                                                       | 81% <sup>b</sup>         | 52% <sup>b</sup>                                         | 31% <sup>b</sup> | 97% <sup>b</sup> | 56%                                                      | 37%                         | 1%                             | 29%                                                    | 28%                          |
| Kongoussi                           | 45%            | 26%                                                       | 92% <sup>b</sup>         | 65% <sup>b</sup>                                         | 35% <sup>b</sup> | 94% <sup>b</sup> | 61%                                                      | 24%                         | 0%                             | 33%                                                    | 16%                          |
| <b>North</b>                        | 37%            | 43%                                                       | 70% <sup>b</sup>         | 49% <sup>b</sup>                                         | 28% <sup>b</sup> | 90% <sup>b</sup> | 67%                                                      | 31%                         | 7%                             | 33%                                                    | 33%                          |
| Gourcy                              | 33%            | 31%                                                       | 80% <sup>b</sup>         | 53% <sup>b</sup>                                         | 21% <sup>b</sup> | 94% <sup>b</sup> | 63%                                                      | 12%                         | 1%                             | 26%                                                    | 42%                          |
| Ouahigouya                          | 39%            | 57%                                                       | 58%                      | 48% <sup>b</sup>                                         | 48% <sup>b</sup> | 84%              | 69%                                                      | 58%                         | 14%                            | 44%                                                    | 18%                          |
| Séguenega                           | 44%            | 22%                                                       | 83% <sup>b</sup>         | 59% <sup>b</sup>                                         | 29% <sup>b</sup> | 93% <sup>b</sup> | 50%                                                      | 30%                         | 8%                             | 20%                                                    | 54%                          |
| Yako                                | 36%            | 51%                                                       | 75% <sup>b</sup>         | 29% <sup>b</sup>                                         | 13%              | 92% <sup>b</sup> | 69%                                                      | 14%                         | 3%                             | 32%                                                    | 32%                          |
| Titao                               | 34%            | 29%                                                       | 61% <sup>b</sup>         | 73% <sup>b</sup>                                         | 38% <sup>b</sup> | 91% <sup>b</sup> | 77% <sup>b</sup>                                         | 26%                         | 7%                             | 0%                                                     | 43%                          |
| <b>Acceleration w/ pneumo mgmt</b>  | 45%            | 40%                                                       | 73% <sup>b</sup>         | 54% <sup>b</sup>                                         | 29% <sup>b</sup> | 88%              | 64%                                                      | 29%                         | 2%                             | 30%                                                    | 26%                          |
| <b>Acceleration w/o pneumo mgmt</b> | 38%            | 36%                                                       | 74% <sup>b</sup>         | 57% <sup>b</sup>                                         | 31% <sup>b</sup> | 94% <sup>b</sup> | 66%                                                      | 14%                         | 4%                             | 32%                                                    | 30%                          |

<sup>a</sup> Case management of pneumonia was only included as a program target in Barsalogho and Gourcy

<sup>b</sup> Baseline coverage for the intervention exceeded target intervention coverage
